# Supplementary material for: Identification and preclinical development of kinetin as a safe error-prone SARS-CoV-2 antiviral and anti-inflammatory therapy
Source: Research Square preprint supplement (doi:10.21203/rs.3.rs-1533971/v1), 2022-04-07
Supplement: Supplementary file 2 [file b4f2f7d3d06290448869f4a1.docx]

**Supplementary Figures and Tables**

**Identification and preclinical development of kinetin as a safe error-prone SARS-CoV-2 antiviral and anti-inflammatory therapy**

Thiago Moreno L. Souza1,2,*#, Vagner D. Pinho3, Cristina F. Setin4; Carolina Q. Sacramento1,2,Rodrigo Marcon4, Natalia Fintelman-Rodrigues1,2, Melina Heller4,Jairo R. Temerozo1,5,6, André C. Ferreira1,2,7,Mayara Mattos1,2,Patrícia B. Momo3,Suelen S. G. Dias1,João Gesto1,2,Filipe Pereira-Dutra1, João Viola8, Dumith C. Bou-Habib5,6, Patrícia T. Bozza1, Anderson R. Aguillón3,Jarbas Siqueira-Junior4, Sergio Macedo-Junior4, Edineia L. Andrade4,; Guilherme P. Fadanni4; Sara E. Tolouei4; Francine B. Potrich4; Adara A. Santos4, Naiani F. Marques4; João B. Calixto4,*,#, Jaime A. Rabi3,*,#

**#**These authors contributed equally to this work

1 – Laboratório de Imunofarmacologia, Oswaldo Cruz Institute, Fundação Oswaldo Cruz (Fiocruz), Rio de Janeiro, RJ, Brazil.

2 - National Institute for Science and Technology on Innovation in Diseases of Neglected Populations (INCT/IDPN), Center for Technological Development in Health (CDTS), Fiocruz, Rio de Janeiro, RJ, Brazil.

3 - Microbiológica Química e Farmacêutuca, Doutor Nicanor, 238 Inhaúma, Rio de Janeiro, RJ, Brazil.

4- Centro de Inovação e Ensaios Pre-clinicos and National Institute for Science and Technology on Innovation in Medicines and Identification of New Therapeutics Targets (INCT-INOVAMED). Avenida Luiz Boiteux Piazza, 1302 Cachoeira do Bom Jesus, 88056-000 Florianópolis, SC Brazil.

5 – National Institute for Science and Technology on Neuroimmunomodulation (INCT/NIM), Oswaldo Cruz Institut, Fiocruz, Rio de Janeiro, RJ, Brazil.

6 – Laboratory on Thymus Research, Oswaldo Cruz Institute, Fiocruz, Rio de Janeiro, RJ, Brazil.

7 - Universidade Iguaçu, Nova Iguaçu, RJ, Brazil.

8 - Program of Immunology and Tumor Biology, Brazilian National Cancer Institute (INCA), Rua André Cavalcanti 37, 5th floor, Centro, Rio de Janeiro, Brazil;

***Correspondent authors:** Thiago Moreno L. Souza ([thiago.moreno@fiocruz.br](mailto:thiago.moreno@fiocruz.br)), João B. Calixto ([joao.calixto@cienp.org.br](mailto:joao.calixto@cienp.org.br) ), Jaime A. Rabi ([jrabi@microbiologica.ind.br](mailto:jrabi@microbiologica.ind.br))**.**

**
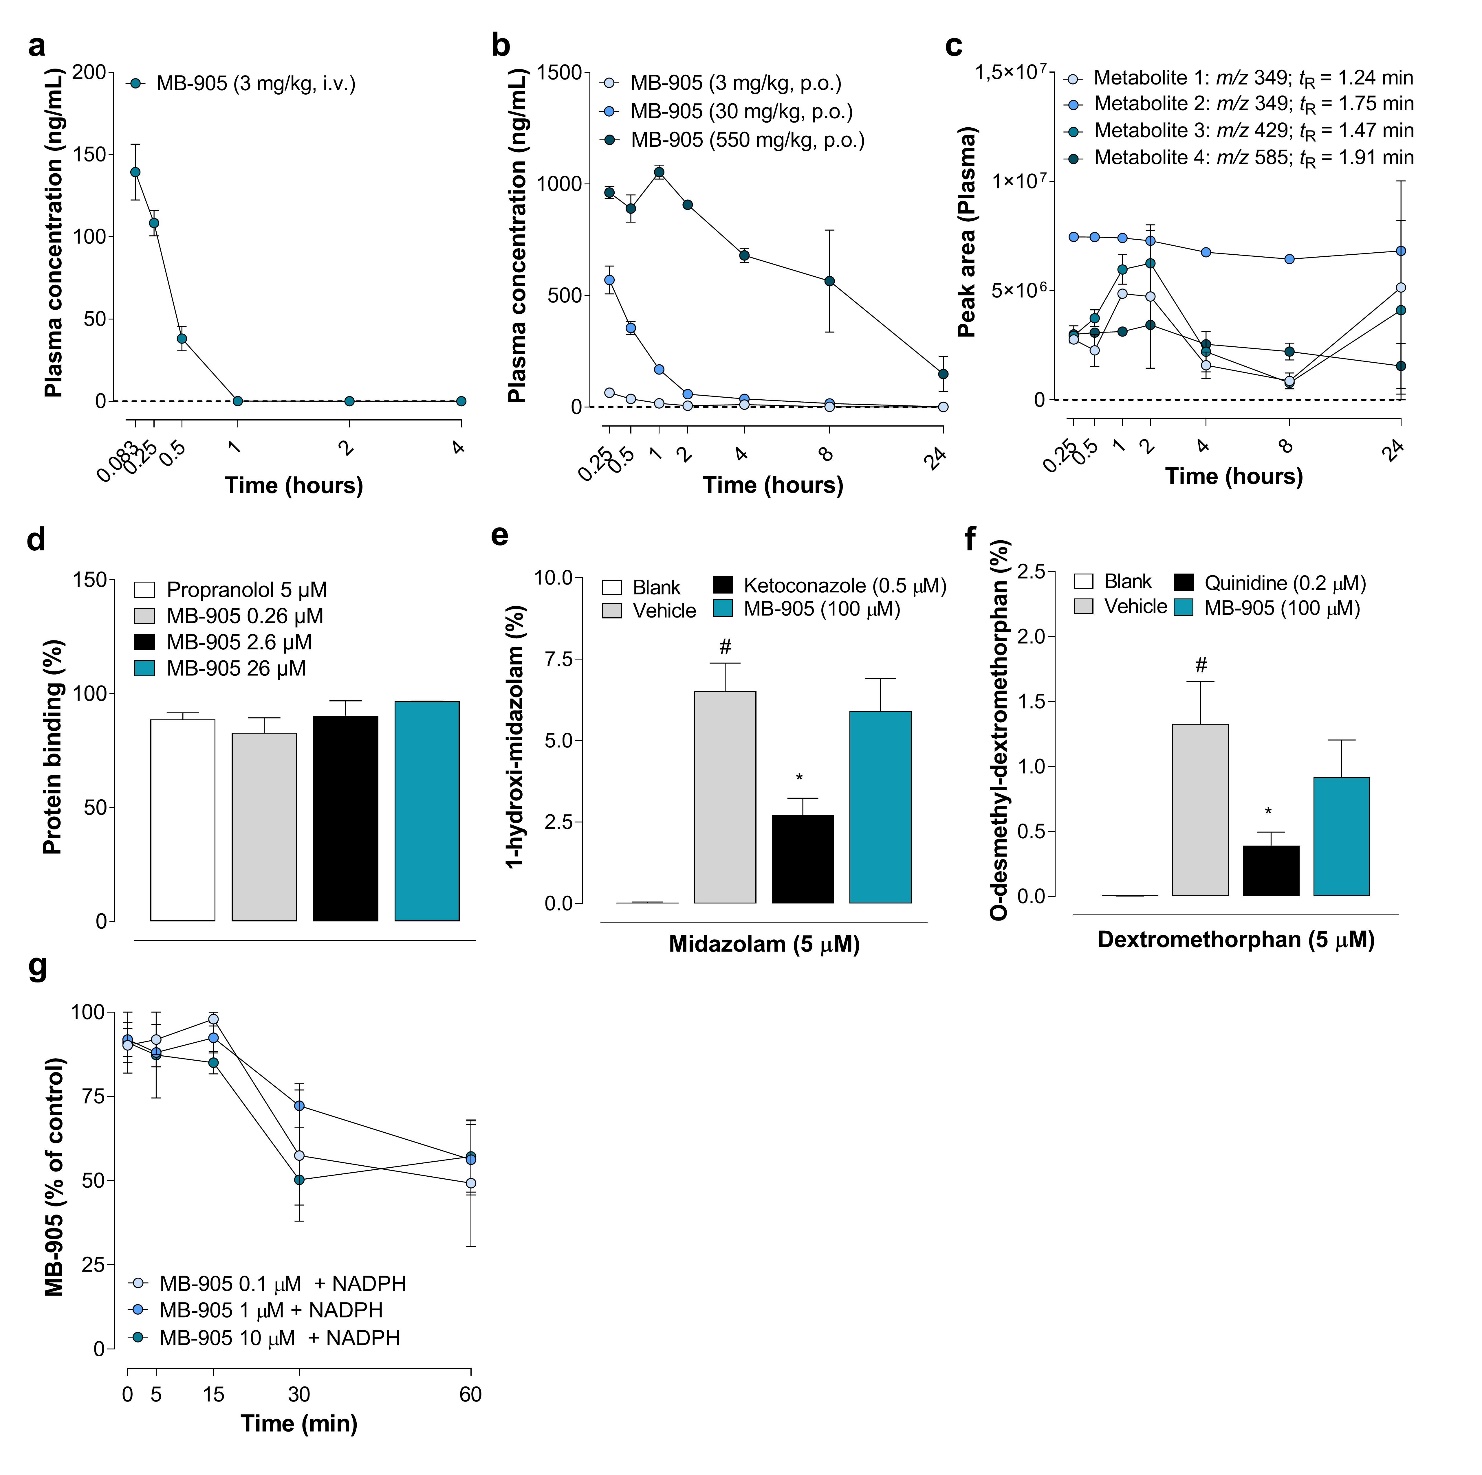
**

**Supplementary Figure 1: Pharmacokinetics in mice, protein binding, CYP inhibition and metabolites. a**, Single intravenous dose (3 mg/kg bodyweight) pharmacokinetics properties of MB-905 in mouse plasma (n = 6); **b**, Single oral doses (3, 30 and 550 mg/kg bodyweight) pharmacokinetics properties of MB-905 in mouse plasma (n = 2-6); **c,** Plasma putative metabolites after treatment with MB-905 (550 mg/kg, p.o.) (n=3); **d,** Evaluation of *in vitro* protein binding percentage of MB-905 (0.26 – 26 µM) in mouse plasma (n = 3); **e,** MB-905 (100 µM) or ketoconazole (0.5 µM- an inhibitor of CYP3A4) were incubated with recombinant human CYP3A4 and midazolam and evaluated the production of 1-hydroxy-midazolam (n = 3); **f,** MB-905 or quinidine (0.2 µM- an inhibitor of CYP2D6) were incubated with recombinant human CYP2D6 and dextromethorphan and evaluated the production of O-demethyl-dextromethorphan (n = 3); **g,** MB-905 (0.1, 1 and 10 µM) was incubated with human liver microssome (HLM) in the presence and in the absence of NADPH following analysis of MB-905 concentrations at 0, 5, 15, 30 and 60 minutes after NADPH (n = 2-3). Data were expressed as mean ± SEM (Standard Error of the Mean). (**e**, **f**) #p<0.05 significantly different from the negative control (blank); *p<0.05 significantly different from the vehicle. One-way ANOVA followed by the Tukey Test were performed. Noncompartmental data analysis was performed using Phoenix WinNonlin®.

**Supplementary Table 1:**  Pharmacokinetic parameters for MB-905 in mice.

| Compound | MB-905 | | |
| --- | --- | --- | --- |
| Dose and Route | 3 mg/kg (i.v.) | 30 mg/kg (p.o.) | 550 mg/kg (p.o.) |
| Cmax (ng/mL) | 155.16 | 569.97 | 1053.37 |
| Tmax (h) | 0.083 | 0.083 | 0.5 |
| T1/2 (h) | 0.22 | 1.11 | 2.72 |
| CL (mL/min/kg) | 918.38 | 1060.15 | 1843.18 |
| Vz (L/kg) | 19.04 | 102.21 | 434.2 |
| AUClast (h*ng/mL) | 55.48 | 355.63 | 4392.27 |
| AUCall (h*ng/mL) | 66.41 | 355.63 | 4392.27 |
| Ke (1/h) | 3.09 | 0.62 | 0.25 |
| F(%) | 100% | 53.50% | 36.10% |

Cmax: Peak concentration; Tmax: Time to reach Cmax; T1/2: Half-life; CL: Clearance; Vz: Volume of distribution; AUClast: Area under de curve (last); AUCall area under de curve (all); Ke: elimination rate constant; F: bioavailability. Noncompartmental data analysis was performed using Phoenix WinNonlin®. Data represents the mean values of 3-6 animals per group.

**
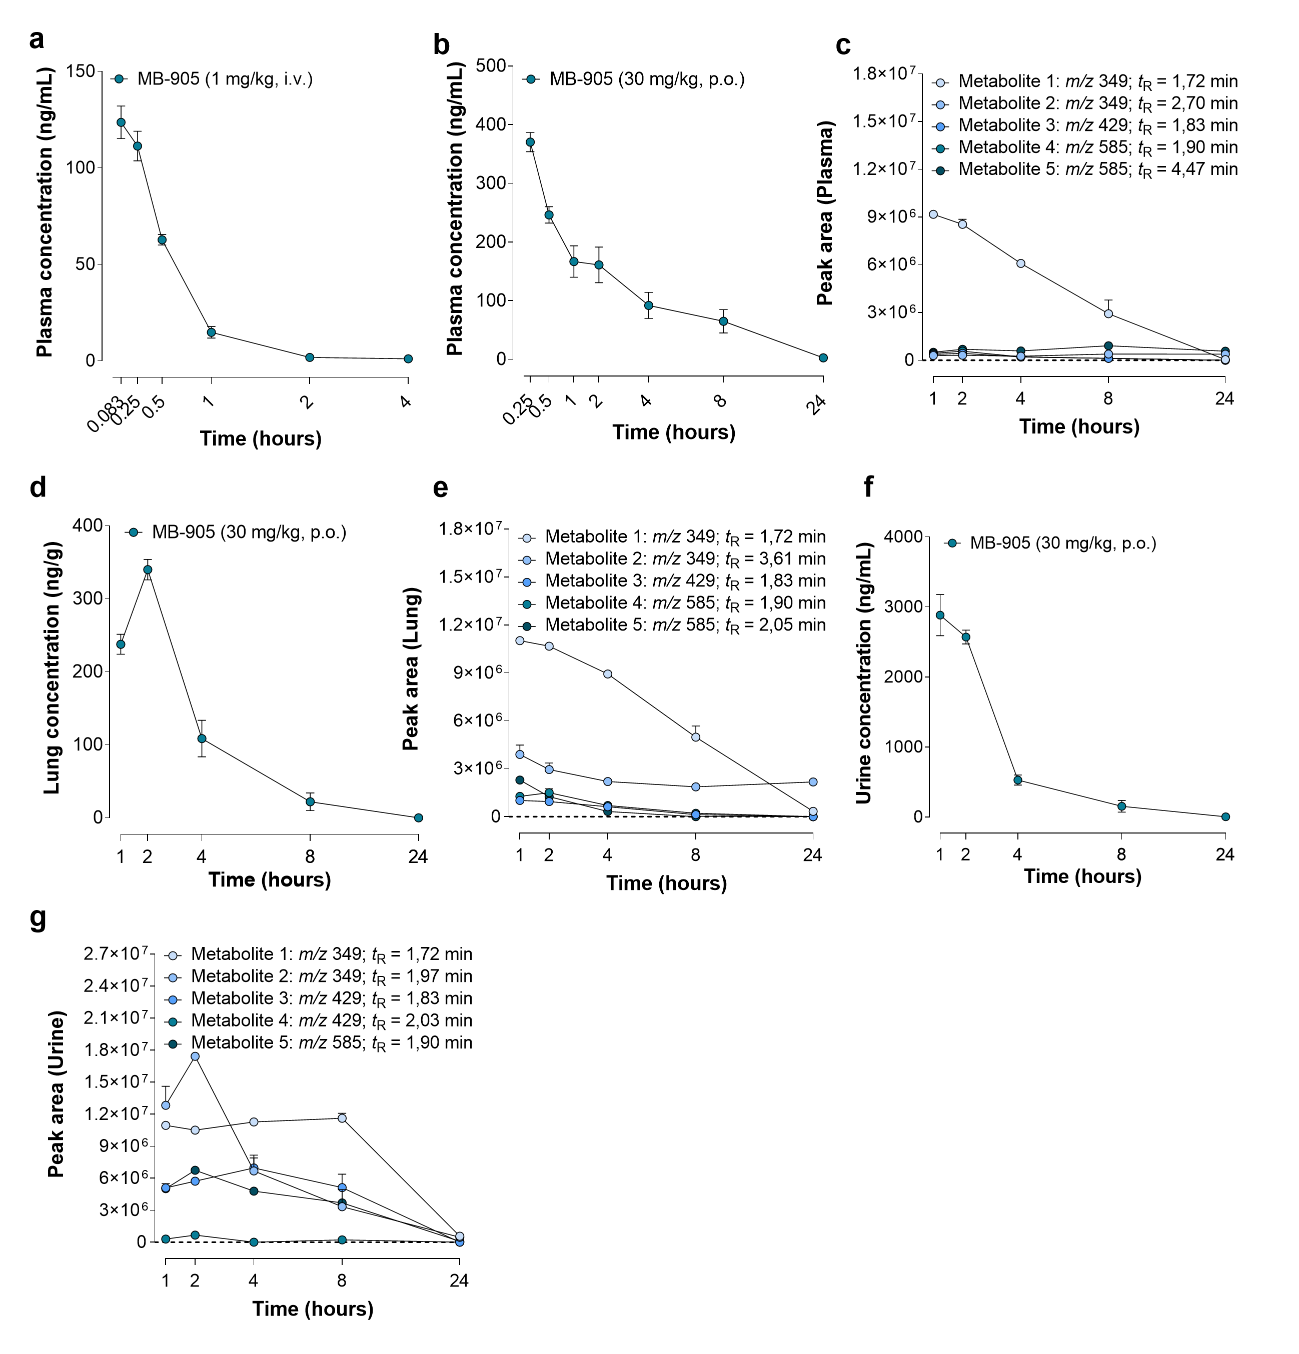
**

**Supplementary Figure 2: Pharmacokinetic and putative metabolites of MB-905 in rats. a**, Single intravenous dose (1 mg/kg bodyweight) pharmacokinetics properties of MB-905 in rat plasma (n = 6); **b**, Single oral dose (30 mg/kg bodyweight) pharmacokinetics properties of MB-905 in rat plasma (n = 5); **c**, Plasma metabolites (5 metabolites) after treatment with MB-905 (30 mg/kg, p.o.) (n = 3); **d,** Single oral dose (30 mg/kg bodyweight) pharmacokinetics properties of MB-905 in lung plasma (n = 3); **e,** Lung metabolites (5 metabolites) after treatment with MB-905 (30 mg/kg, p.o.) (n = 3); **f,** Single oral dose (30 mg/kg bodyweight) pharmacokinetics properties of MB-905 in rat urine (n = 3); **g,** Urine metabolites (5 metabolites) after treatment with MB-905 (30 mg/kg, p.o.) (n = 3). Data were expressed as mean ± SEM (Standard Error of the Mean). Noncompartmental data analysis was performed using Phoenix WinNonlin®.

**Supplementary Table 2:**  Pharmacokinetic parameters for MB-905 in rats.

| Compound | MB-905 | |
| --- | --- | --- |
| Dose and Route | 1 mg/kg (i.v.) | 30 mg/kg (p.o.) |
| Cmax (ng/mL) | 123.61 | 370.47 |
| Tmax (h) | 0.083 | 0.25 |
| T1/2 (h) | 0.56 | 3.81 |
| CL (mL/min/kg) | 213.63 | 330.53 |
| Vz (L/kg) | 10.4 | 109.18 |
| AUClast (h*ng/mL) | 77.12 | 1498.08 |
| AUCall (h*ng/mL) | 77.12 | 1498.08 |
| Ke (1/h) | 1.23 | 0.18 |
| F(%) | 100% | 64.70% |

Cmax: Peak concentration; Tmax:Time to reach Cmax; T1/2: Half-life; CL: Clearance; Vz: Volume of distribution; AUClast: Area under de curve (last); AUCall: area under de curve (all); Ke: elimination rate constant; F: bioavailability. Noncompartmental data analysis was performed using Phoenix WinNonlin®. Data represents the mean values of 5-6 animals per group.

**
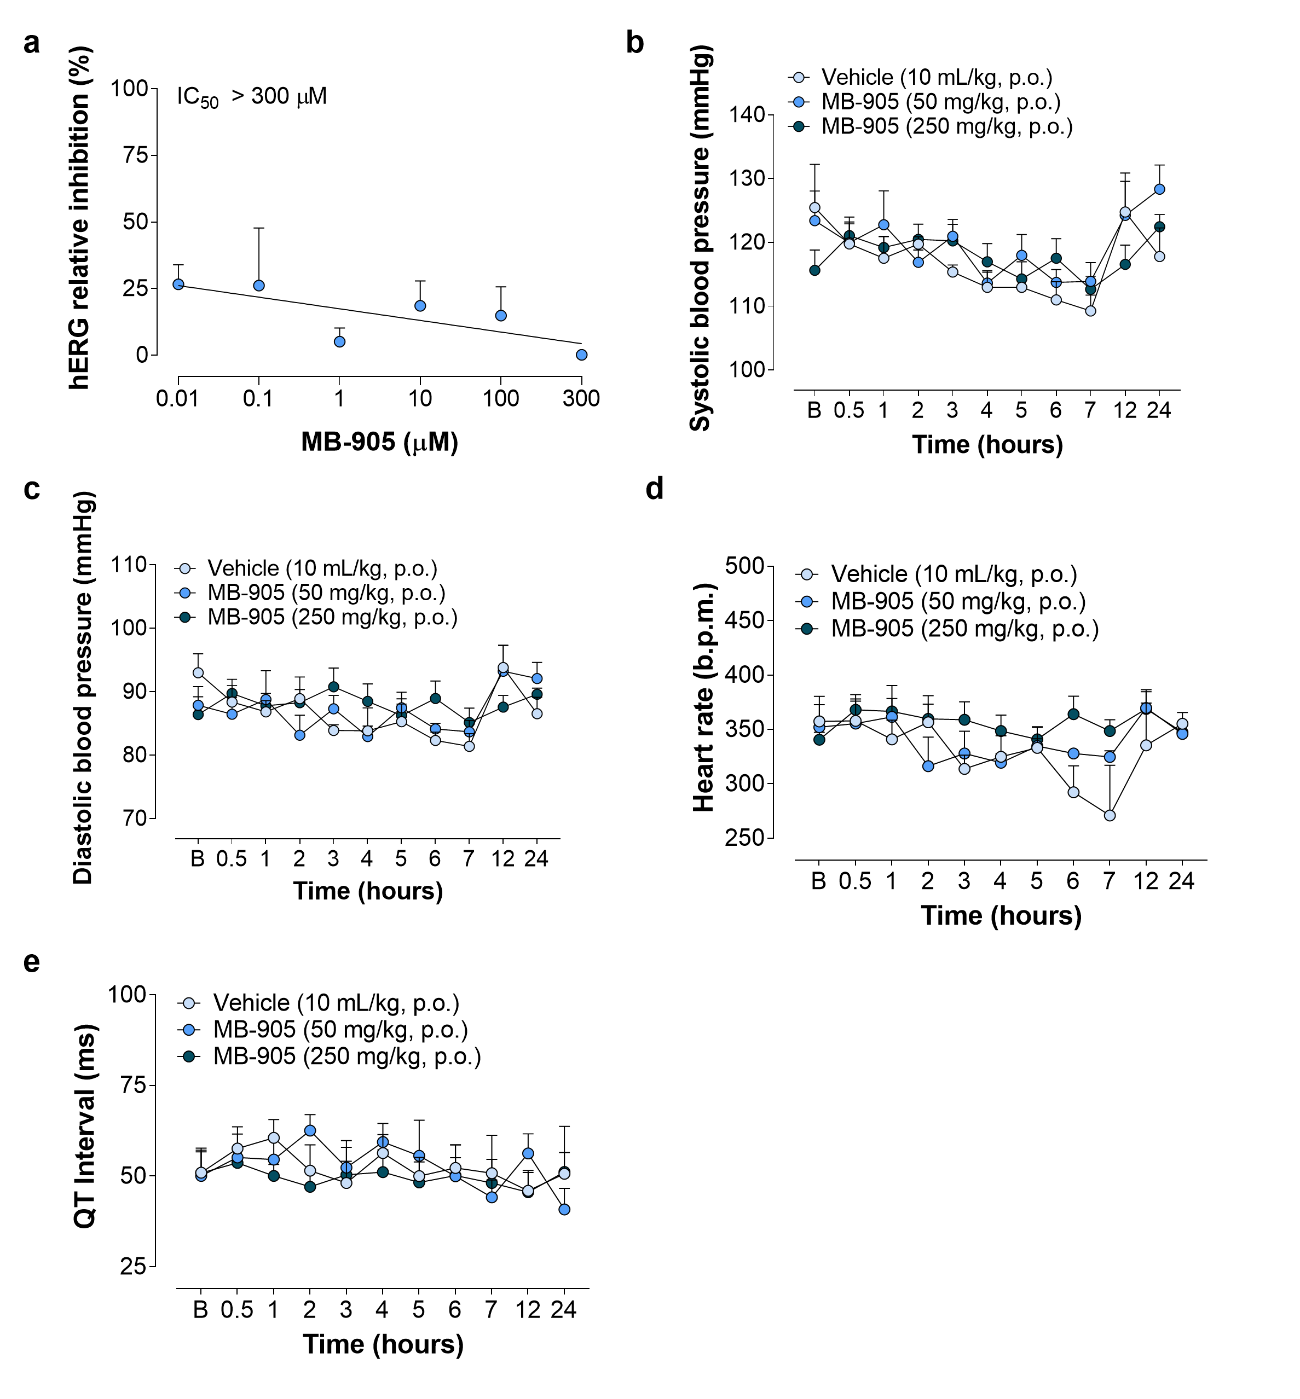
**

**Supplementary Figure 3. hERG channel assay *in vitro*** **and** **cardiovascular safety pharmacology in *vivo***. **a**, Concentration-response curve of MB-905 on the hERG channel inhibition assay (% of hERG relative inhibition). Data are expressed as mean ± SEM (n=3) through non-linear regression; **b**, Systolic Blood Pressure in millimeter of mercury (mmHg); **c**, Diastolic Blood Pressure in mmHg; **d**, Heart Rate expressed as beats per minute (bpm); **e**, QT-interval in millisecond (ms) in rats treated with vehicle (5 ml/Kg, p.o.) or MB-905 (50 or 250 mg/Kg, p.o.) administered orally once a day for 7 consecutive days. Data were expressed as mean ± SEM (n= 4-6). **c-f**: statistical analyses were performed using mixed effects model followed by the Dunnet’s test.

**Supplementary Figure 4** – **Kinetin-ribose-5’-monophosphate as a substrate for 5’-nucleotidase.** Liver extracts from untreated Swiss webster mice, 20-week old, were incubated with MB-711 (Kinetin-ribose-5’-monophosphoramidate) or AMP as a substrate for a commercial reaction to detect 5’-nucletidase activity. Liver extracts enzymes cathepsin A or carboxylesterase 1 and histidine triad nucleotide-binding protein 1 (HINT1) released nucleotide monophosphate from MB-711, to be further used by 5’-nucleotidase (#ab235945 from [www.abcam.com](http://www.abcam.com)). Each column represents the means ± SEM of three independent experiments.
